# Supplementary material for: Effect of Whole-Genome Duplication on the Evolutionary Rescue of Sterile Hybrid Monkeyflowers
Source: PubMed Central journal article supplement — Plant Commun. 2020 Jul 3;1(6):100093. doi: 10.1016/j.xplc.2020.100093 (PMC7747968; doi:10.1016/j.xplc.2020.100093), 2020-07-03
Supplement: mmc1.pdf [file mmc1.pdf]

**Plant Communications, Volume 1**

**Supplemental Information**

**Effect of Whole-Genome Duplication on the Evolutionary Rescue of Sterile Hybrid Monkeyflowers**

**Sofie Meeus, Kristýna Šemberová, Nico De Storme, Danny Geelen, and Mario Vallejo-Marín**

1 Effect of whole-genome duplication on the evolutionary rescue of  
2 sterile hybrid monkeyflowers

3

4 Sofie Meeus<sup>1, †</sup>

5 Kristýna Šemberová<sup>2</sup>

6 Nico De Storme<sup>3, ‡</sup>

7 Danny Geelen<sup>3</sup>

8 Mario Vallejo-Marín<sup>1, \*</sup>

9

10 <sup>1</sup> Department of Biological and Environmental Sciences. University of Stirling. Stirling, FK9 4LA,  
11 Scotland, United Kingdom.

12 <sup>2</sup> Department of Botany. Charles University. Prague, 2, 128 43, Czech Republic.

13 <sup>3</sup> Department of Plants and Crops, Ghent University. Gent, 9000, Belgium.

14

15 <sup>†</sup> Current address: Meise Botanic Garden, Nieuwelaan 38, 1860 Meise, Belgium.

16 <sup>‡</sup> Current address: Department of Biosystems, KU Leuven. Heverlee, 3001, Belgium.

17

18 \* Author for correspondence: [mario.vallejo@stir.ac.uk](mailto:mario.vallejo@stir.ac.uk)

19

20 **Running title:** Evolutionary rescue by whole-genome duplication

21 **Short Summary:** Hybridisation and whole-genome duplication can be creative evolutionary forces  
22 and fuel adaptation and speciation. Here we use natural and synthetically-produced hybrid and  
23 polyploid monkeyflowers (*Mimulus spp.*) to study how polyploidy contributes to the fertility,  
24 reproductive isolation, phenotype and performance of hybrids in the field.

25

26 Supplemental Information

27 **Table S1.** Germination proportion of seeds derived from crosses within and among ploidy levels and  
28 taxa in *Mimulus spp.* Only crosses that yielded more than 10 seeds per fruit were included in this  
29 experiment. For each replicate (N) we tested between 10 and 110 seeds (average = 69 seeds). Taxa:  
30 gut-2x = *M. guttatus* (diploid); gut-4x = *M. guttatus* (neo-tetraploid); lut-4x = *M. luteus* (ancient  
31 tetraploid); per-6x = *M. peregrinus* (neo-allohexaploid). Inter-ploidy and Inter-species, denote  
32 whether the cross was among individuals of different ploidy levels or belonging to different species  
33 (*M. guttatus*, *M. luteus* and *M. peregrinus*), respectively; 1 = Yes, 0 = No.

| Cross Type      | Inter-ploidy | Inter-species | Mean ± SE     | N         |
|-----------------|--------------|---------------|---------------|-----------|
| gut-2x X gut-4x | 1            | 0             | 0.040         | 1         |
| gut-2x X lut-4x | 1            | 1             | 0.655 ± 0.015 | 2         |
| gut-2x X per-6x | 1            | 1             | 0             | 2         |
| gut-4x X gut-2x | 1            | 0             | 0.005 ± 0.005 | 4         |
| gut-4x X per-6x | 1            | 1             | 0.563 ± 0.285 | 3         |
| lut-4x X gut-2x | 1            | 1             | 0.085 ± 0.085 | 2         |
| lut-4x X per-6x | 1            | 1             | 0.015 ± 0.015 | 4         |
| per-6x X gut-2x | 1            | 1             | 0.035 ± 0.022 | 4         |
| per-6x X gut-4x | 1            | 1             | 0.470 ± 0.096 | 3         |
| per-6x X lut-4x | 1            | 1             | 0.020 ± 0.020 | 4         |
| gut-2x X gut-2x | 0            | 0             | 0.670 ± 0.040 | 2         |
| gut-4x X gut-4x | 0            | 0             | 0.847 ± 0.068 | 3         |
| gut-4x X lut-4x | 0            | 1             | 0.003 ± 0.003 | 3         |
| lut-4x X gut-4x | 0            | 1             | 0.460 ± 0.260 | 3         |
| lut-4x X lut-4x | 0            | 0             | 0.665 ± 0.073 | 4         |
| per-6x X per-6x | 0            | 0             | 0.950 ± 0.013 | 4         |
| <b>Total</b>    |              |               |               | <b>48</b> |

34

35 **Table S2:** Populations, population codes, life history, origin, and degree of inbreeding of the plants  
36 used to generate synthetic hybrids.

| <b>Population code</b> | <b>Population</b>            | <b>Species</b>                                                        | <b>Country</b> | <b>Inbred/field collected</b> | <b>Life history</b> |
|------------------------|------------------------------|-----------------------------------------------------------------------|----------------|-------------------------------|---------------------|
| <b>COL</b>             | Coldstream, Scottish Borders | <i>M. guttatus</i>                                                    | UK             | Field collected               | Perennial           |
| <b>DBL</b>             | Dunblane, Perthshire         | <i>M. guttatus</i>                                                    | UK             | 1 generation inbred           | Perennial           |
| <b>DUN</b>             | Dunes, Oregon                | <i>M. guttatus</i>                                                    | USA            | 9 generations inbred          | Perennial           |
| <b>HOU</b>             | Houghton Lodge, Hampshire    | <i>M. guttatus</i>                                                    | UK             | Field collected               | Perennial           |
| <b>LMC</b>             | Lower Mendocino County, CA   | <i>M. guttatus</i>                                                    | USA            | Field collected               | Annual              |
| <b>COL</b>             | Coldstream, Scottish Borders | <i>M. luteus</i>                                                      | UK             | 3 generations inbred          | Perennial           |
| <b>EVI</b>             | Evie, Orkney                 | <i>M. luteus</i>                                                      | UK             | 1 generation inbred           | Perennial           |
| <b>EY</b>              | El Yeso                      | <i>M. luteus var. luteus</i>                                          | Chile          | 5 generations inbred          | Perennial           |
| <b>EYxRC</b>           | Artificial hybrid            | <i>M. luteus var. luteus</i><br>x<br><i>M. luteus var. variegatus</i> | -              | 1 generation inbred           | Perennial           |
| <b>RC</b>              | Rio Cipreses                 | <i>M. luteus var. variegatus</i>                                      | Chile          | 5 generations inbred          | Perennial           |

37

38

39 **Table S3.** Individuals and families used in the common garden experiment in the glasshouse. All  
40 individuals were grown from seed.

| <b>Taxon</b>                      | <b>Number of seed families</b> | <b>Number of individuals</b> | <b>Number of flowers</b> |
|-----------------------------------|--------------------------------|------------------------------|--------------------------|
| <i>M. guttatus</i>                | 7                              | 113                          | 236                      |
| <i>M. luteus</i>                  | 5                              | 200                          | 99                       |
| <i>M. × robertsii</i> (synthetic) | 26                             | 255                          | 582                      |
| <i>M. peregrinus</i>              | 17                             | 303                          | 618                      |
| (synthetic)                       |                                |                              |                          |
| <i>M. peregrinus</i>              | 4                              | 73                           | 160                      |
| (natural)                         |                                |                              |                          |
| <b>Total</b>                      | <b>59</b>                      | <b>843</b>                   | <b>1,796</b>             |

41

42 **Table S4.** Number of genotypes and clonal replicates (in parenthesis) used in the field experiment in Leadhills, Scotland (2015-2016) to assess survival of  
43 *Mimulus spp.* with different ploidy levels. *Natural* refers to individuals obtained from field populations, while *synthetic* indicates inter-specific hybrid  
44 genotypes produced through artificial crossing as well as synthetic polyploids derived from colchicine treatment (see Methods).

| Species               | 2x Natural | 3x Natural | 3x Synthetic | 4x Natural | 4x Synthetic | 6x Natural | 6x Synthetic | 8x Synthetic | Total            |
|-----------------------|------------|------------|--------------|------------|--------------|------------|--------------|--------------|------------------|
| <i>M. guttatus</i>    | 34 (87)    | -          | -            | -          | 15 (29)      | -          | -            | -            | 49 (116)         |
| <i>M. luteus</i>      | -          | -          | -            | 27 (71)    | -            | -          | -            | 5 (15)       | 32 (86)          |
| <i>M. peregrinus</i>  | -          | -          | -            | -          | -            | 73 (212)   | 56 (160)     | -            | 129 (372)        |
| <i>M. × robertsii</i> | -          | 19 (57)    | 69 (197)     | -          | -            | -          | -            | -            | 88 (254)         |
| <b>Total</b>          |            |            |              |            |              |            |              |              | <b>298 (828)</b> |

45

46

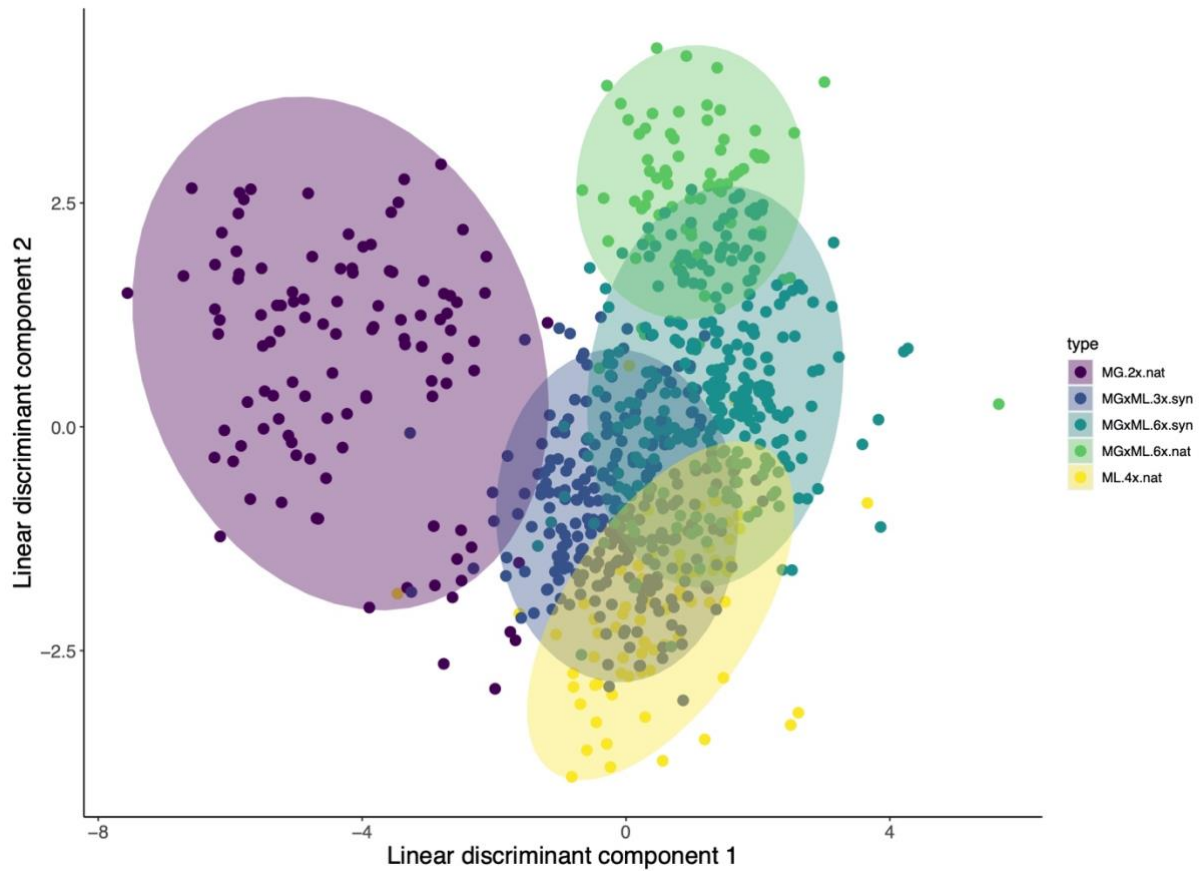

47

48 **Figure S1.** Linear discriminant analysis of 16 phenotypic traits in monkeyflowers (*Mimulus spp.*)  
49 measured in a common garden in the glasshouse. MG.2x.nat = *M. guttatus*, diploid; MGxML.3x.syn =  
50 synthetic *M. × robertsii*, triploid; MGxML.6x.syn = synthetic *M. peregrinus*, allohexaploid; ML.4x.nat  
51 = *M. luteus*, tetraploid.

52

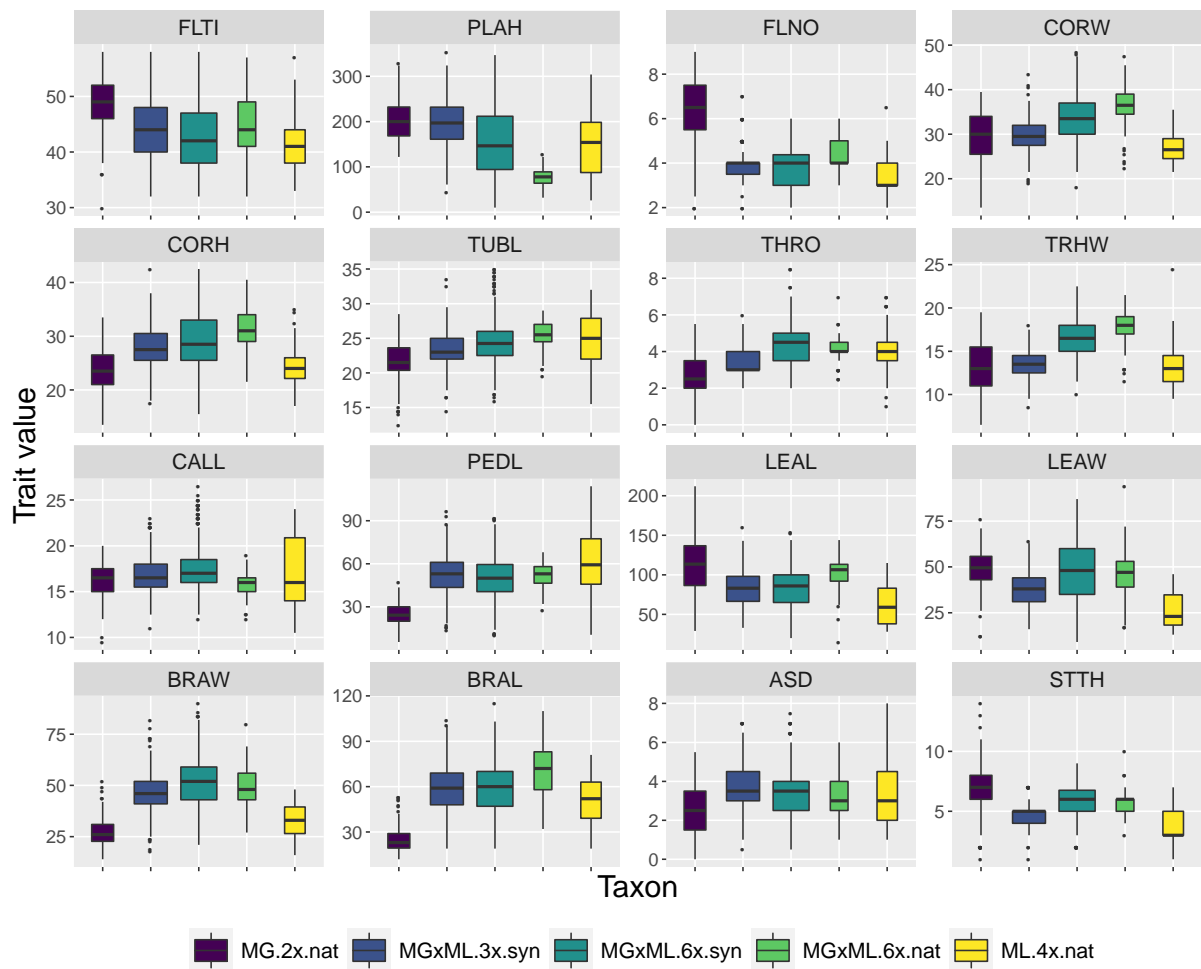

53

54 **Figure S2.** Comparison of 16 phenotypic traits in five monkeyflowers (*Mimulus spp.*) measured in a  
 55 common garden in the glasshouse. MG.2x.nat = *M. guttatus*, diploid; MGxML.3x.syn = synthetic *M. ×*  
 56 *robertsii*, triploid; MGxML.6x.syn = synthetic *M. peregrinus*, allohexaploid; MGxML.6x.nat = natural  
 57 *M. peregrinus*, allohexaploid; ML.4x.nat = natural *M. luteus*, tetraploid. The traits we measured  
 58 were: plant height (PLAH), stem thickness (STTH), leaf width (LEAW) and length (LEAL) of the largest  
 59 leaf, bract width (BRAW) and length (BRAL), days to flowering (FLTI), flowering node of first flower  
 60 (FLNO) and pedicel length (PEDL), corolla width (CORW), corolla height (CORH), corolla tube length  
 61 (TUBL), throat opening (THRO), throat width (TRHW), calyx length (CALL), and anther-stigma  
 62 distance (ASD). All units are in mm except FLTI (days) and FLNO (flower number).



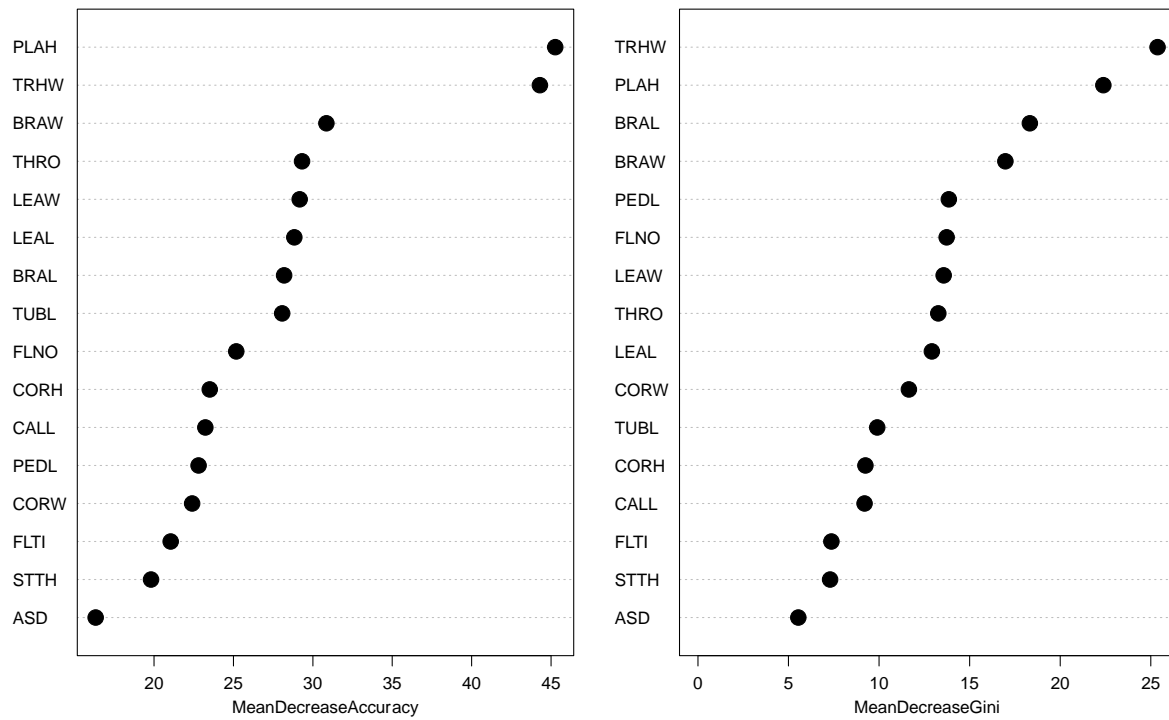

63

64 **Figure S3.** Variable importance for phenotypic classification as measured by Random Forest analysis  
65 in a common garden experiment of four taxa of monkeyflowers grown in the glasshouse. The five  
66 taxa included here were: *M. guttatus*, *M. luteus*, synthetically created *M. × robertsii* and *M.*  
67 *peregrinus*, and natural *M. peregrinus*.

68

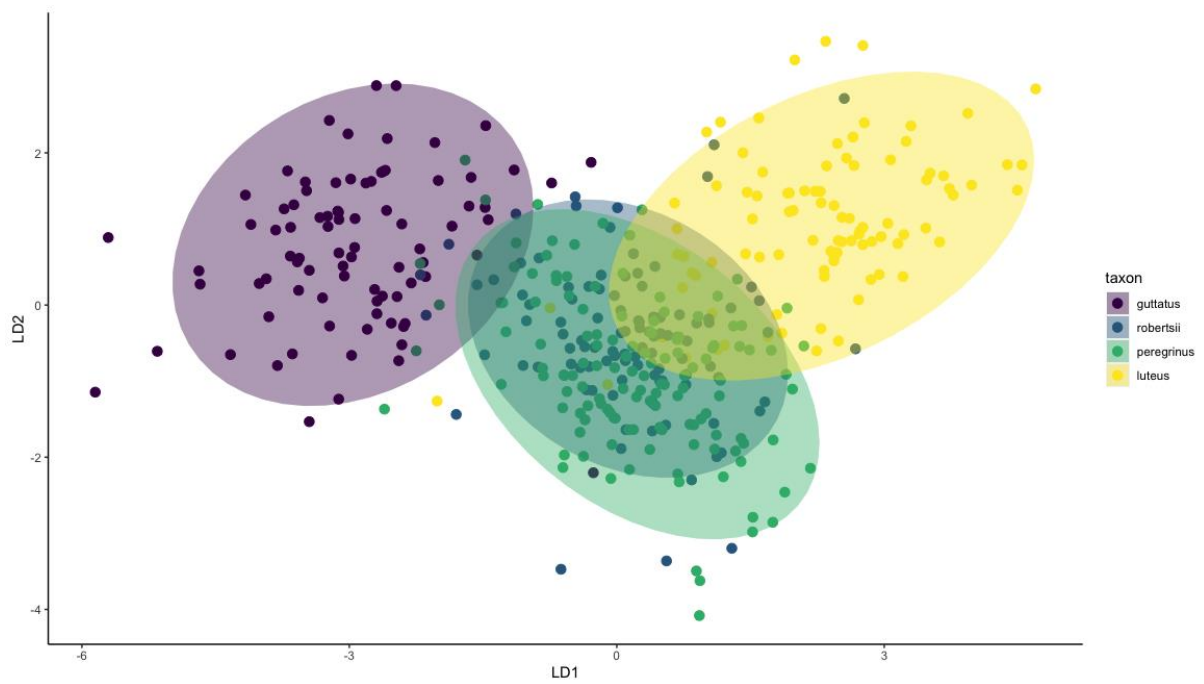

69

70 **Figure S4.** Linear discriminant analysis of 9 phenotypic traits in monkeyflowers (*Mimulus spp.*)

71 measured in a field plot in central Scotland.

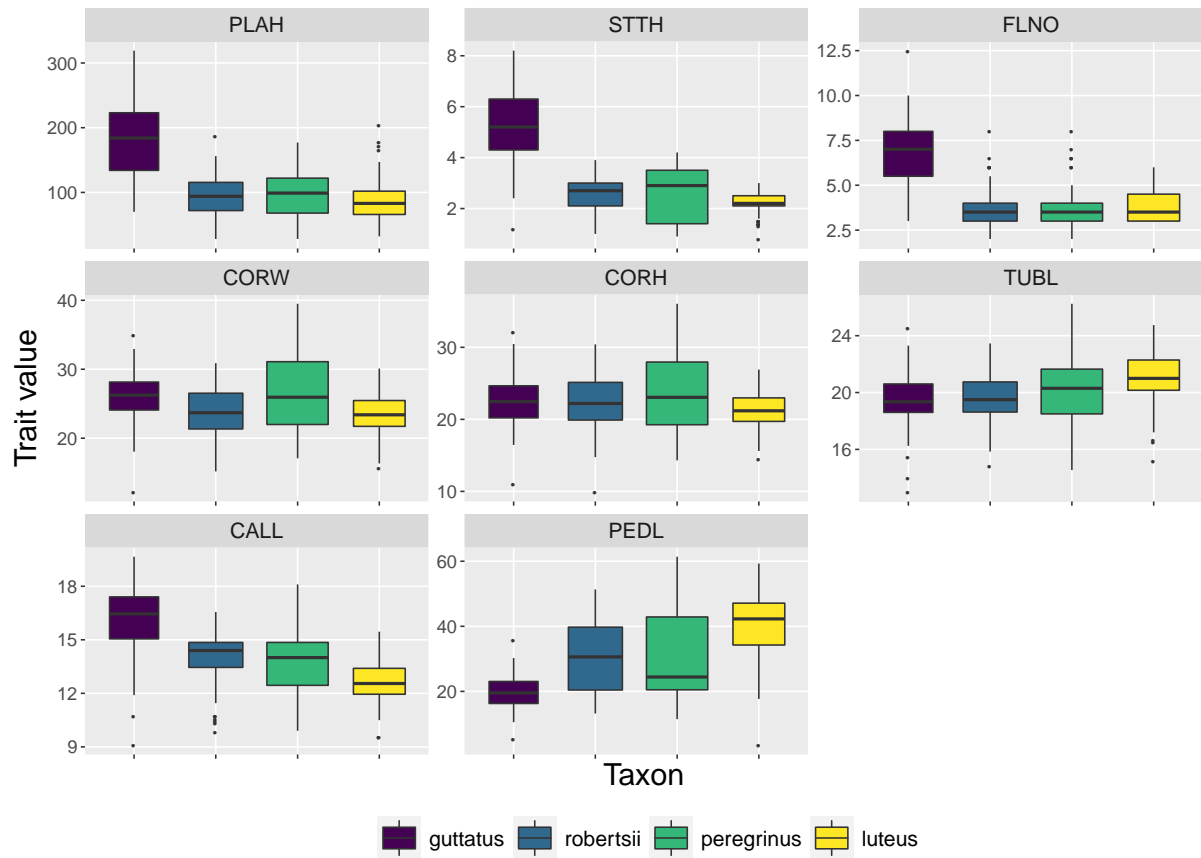

**Figure S5.** Comparison of eight phenotypic traits among four monkeyflower taxa (*Mimulus spp.*) measured in a field plot in central Scotland. Trait names as in Figure S2. All units are in mm except FLNO (flower number).
